# Supplementary material for: Aqueous-Phase Detection of Explosive Residues: Sulfonyl Chloride-Appended Oxacalix[4]arene for 2,4-DNT Monitoring
Source: Research Square preprint supplement (doi:10.21203/rs.3.rs-6881765/v1), 2025-07-01
Supplement: Supplementary file 1 [file 285e8f7c58ac7bf66960c6c7.docx]

**Supplementary data**


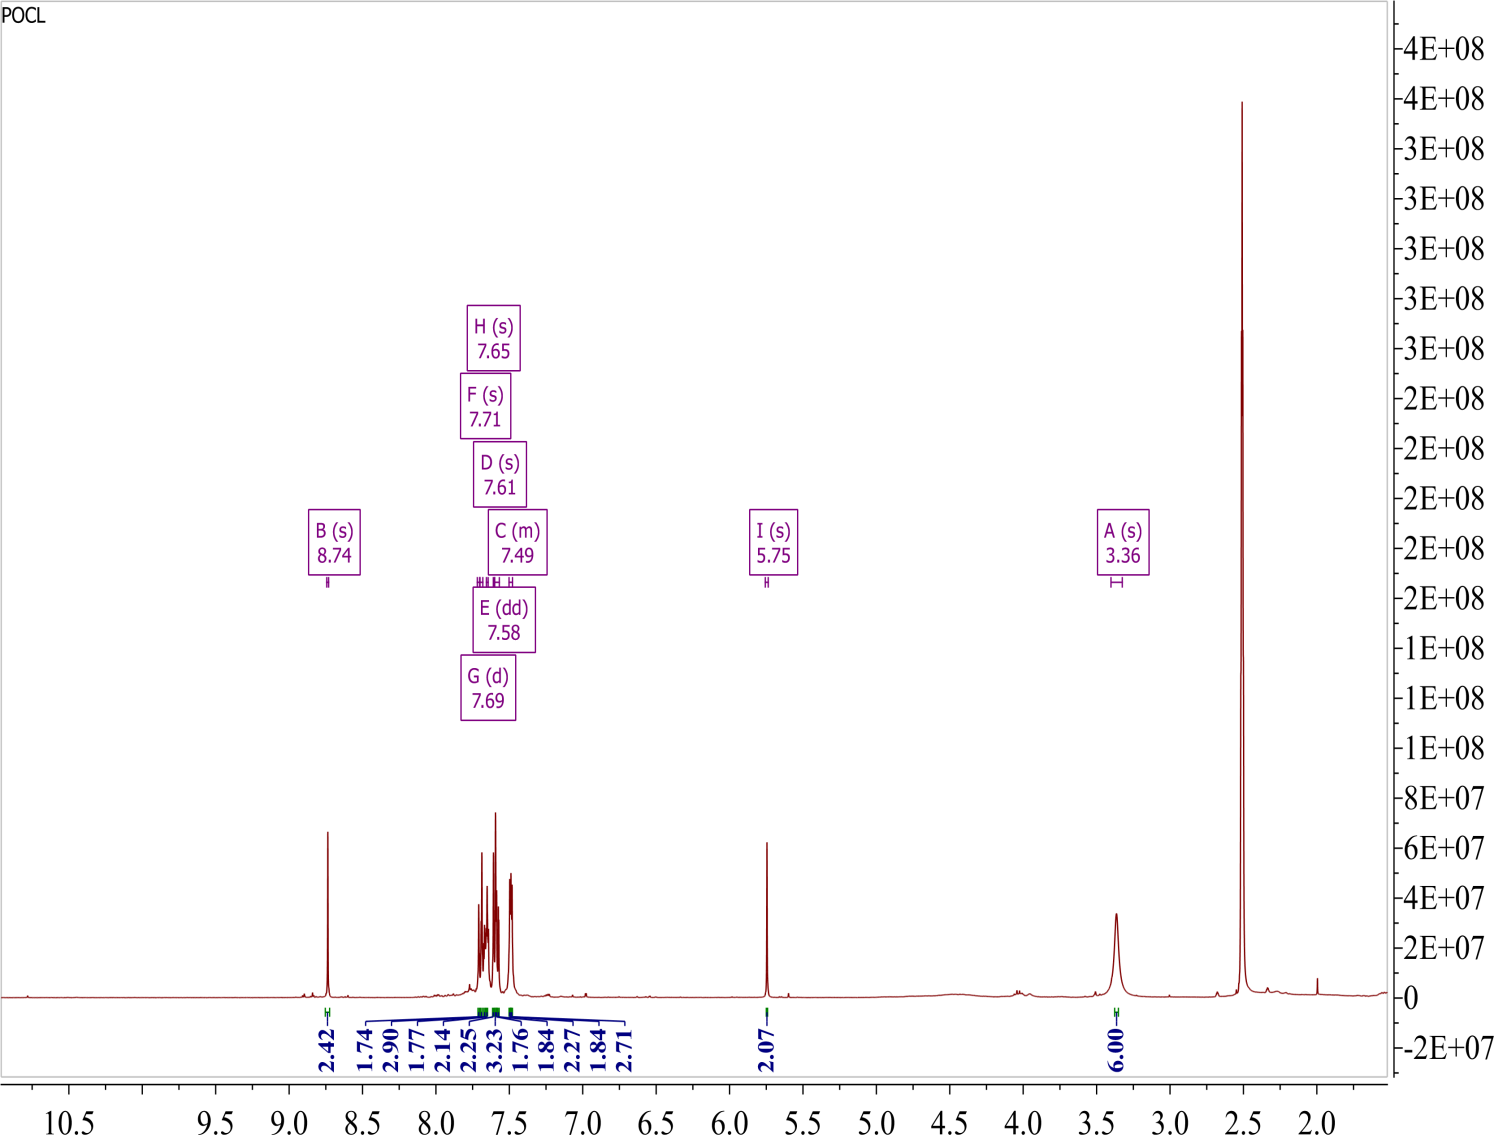


**Figure S1 1H NMR showing attachment of sulfonyl chloride to oxacalix[4]arene and formation of DCOC**


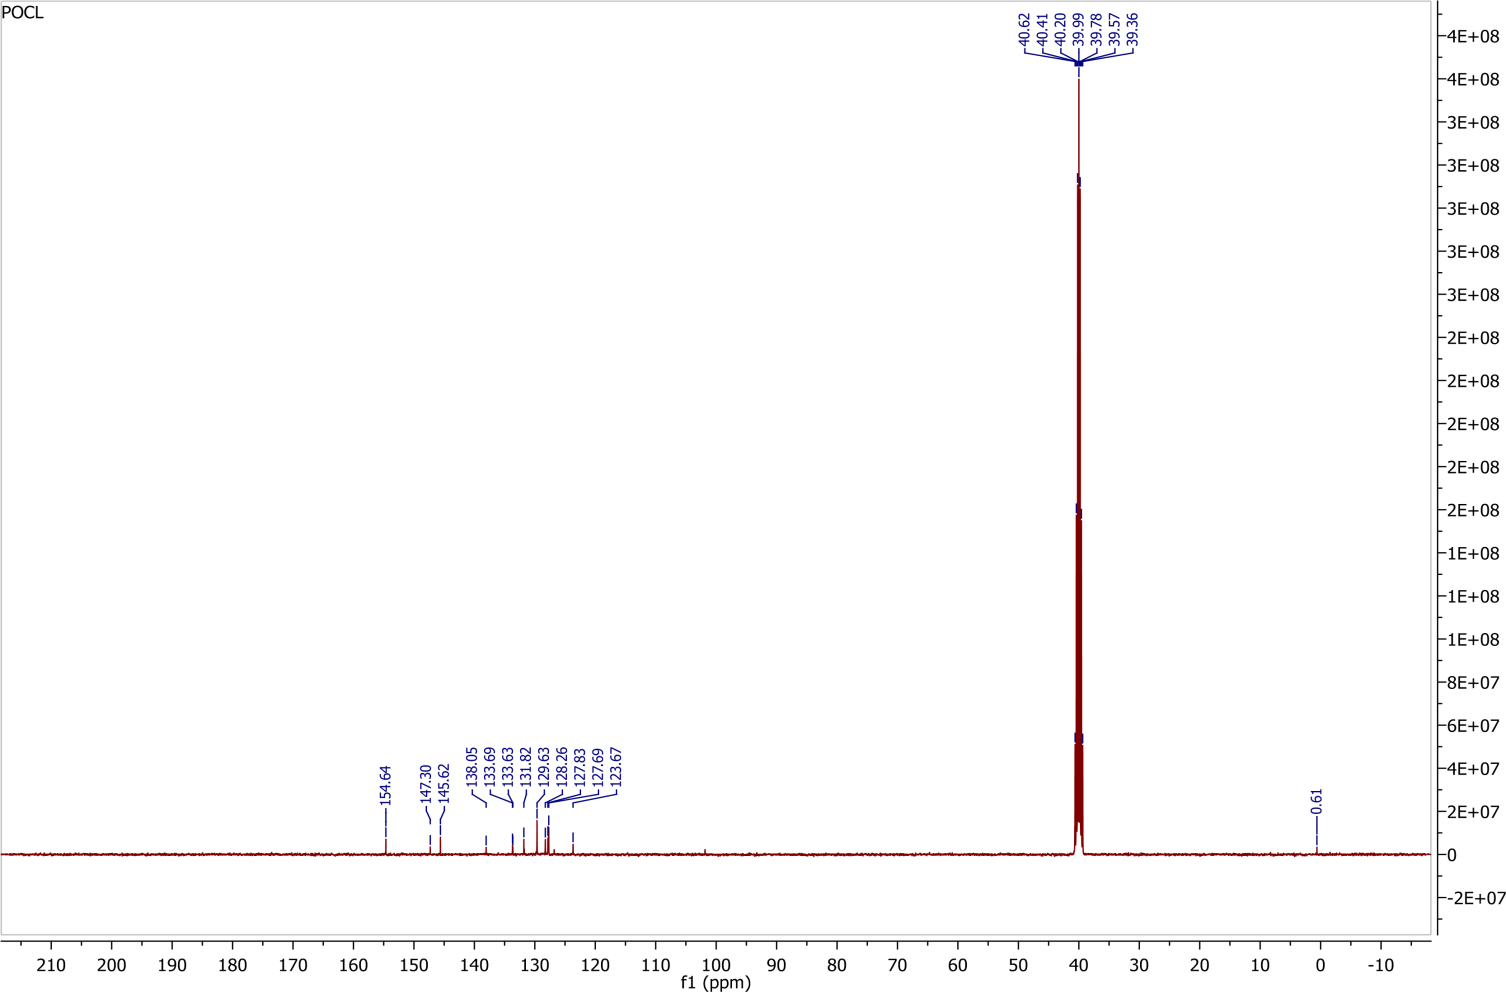


**Figure S2 13C NMR of DCOC**

**Figure S3 Competitive emission spectra of DCOC with 2,4- DNT in presence of other explosives (A= DCOC+ 2,4- DNT, B= DCOC+ 1,3- DNB, C= DCOC+ 2,3- DNT, D= 2,4- DNT, E= DCOC+ 2,6-DNT, F= DCOC+ 4-NP, G= DCOC+ 4-NT, H= DCOC+ PA)**


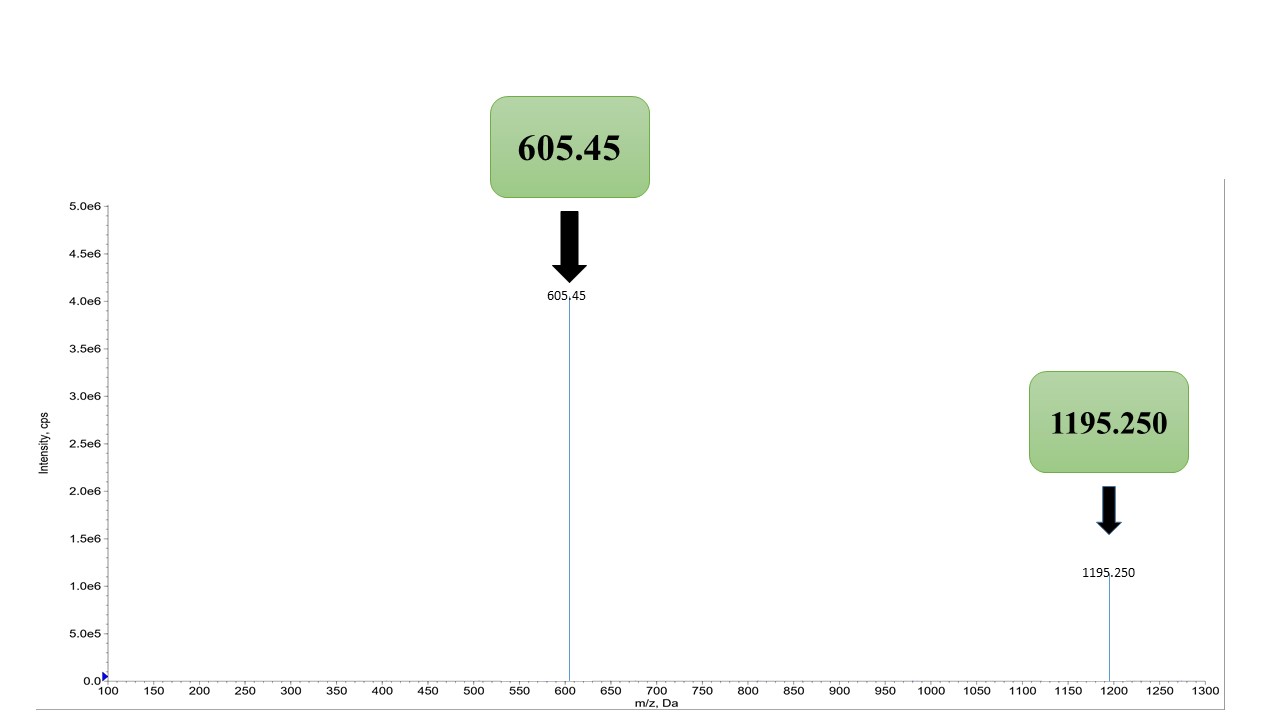


**Figure S4 MS/MS of DCOC and 2,4-DNT complex**


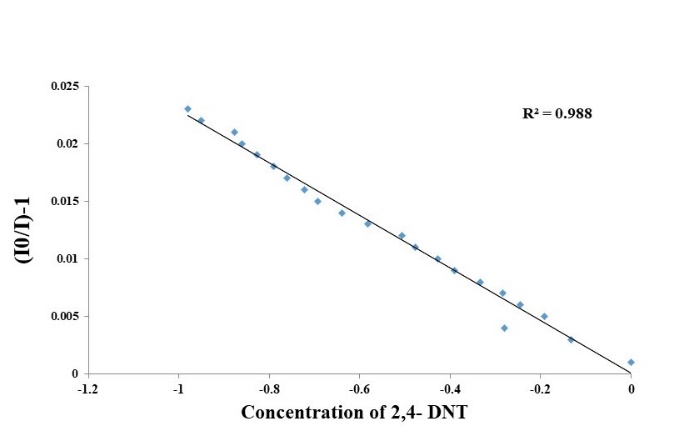

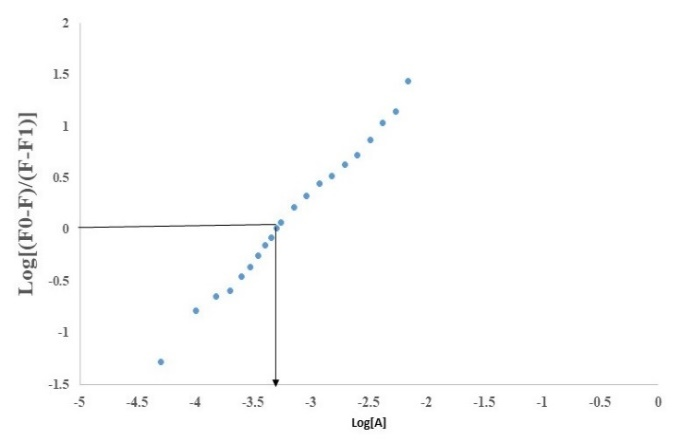


**(B)**

**(A)**

**Figure S5 (A) Linear regression fit (double-logarithmic plot) of the titration data as a function of DCOC concentration (B) Stern-Volmer plot of the quenching of DCOC by 2,4-DNT (mM) in ACN**
